# Supplementary material for: Greener synthesis of dimethyl carbonate from carbon dioxide and methanol using a tunable ionic liquid catalyst
Source: publisher site journal article supplement (doi:10.1515/chem-2019-0137), 2019-12-31
Supplement: Supplementary file 1 [file chem-2019-0137_sm.pdf]

## Supplementary Material

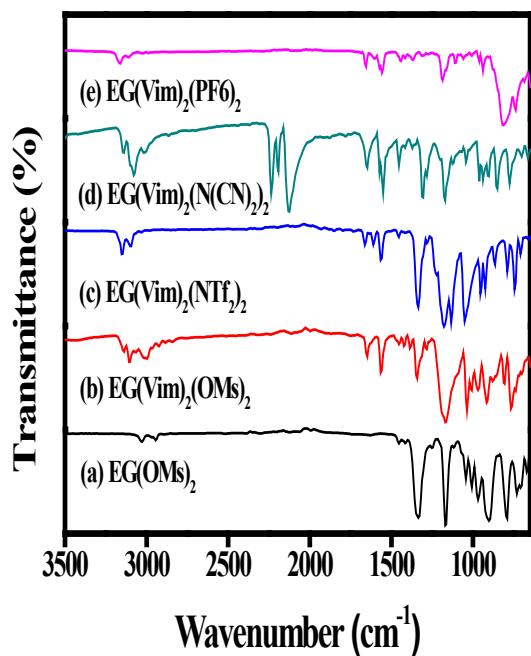

Figure 1: FT-IR spectrum of ethylene glycol based ILs.

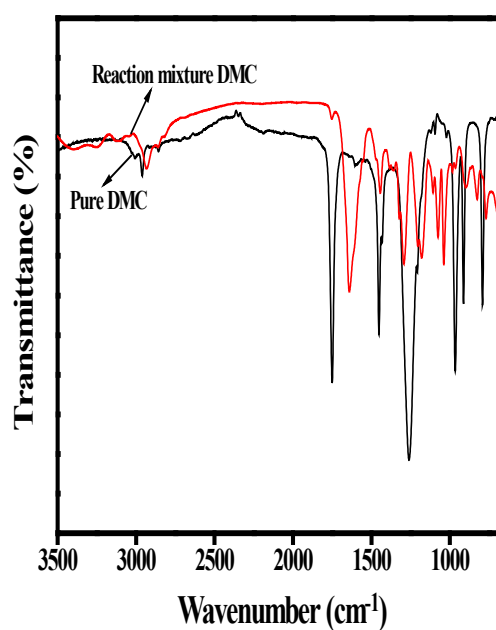

Figure 3: FT-IR spectrum of reaction mixture DMC and pure DMC.

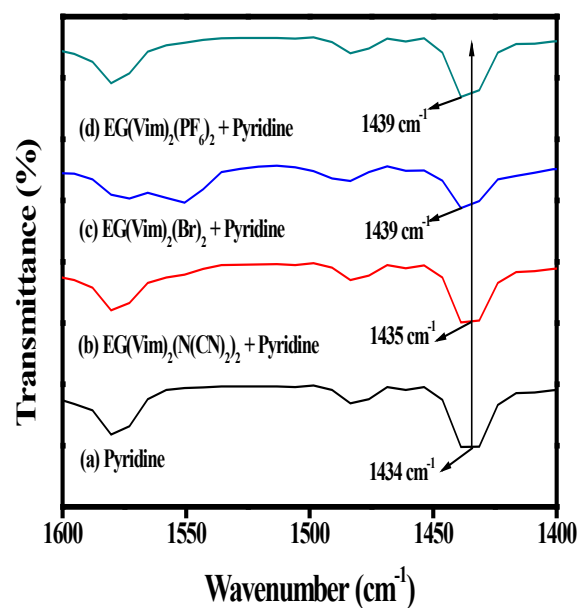

Figure 2: Acidity measurements of ethylene glycol based ILs.

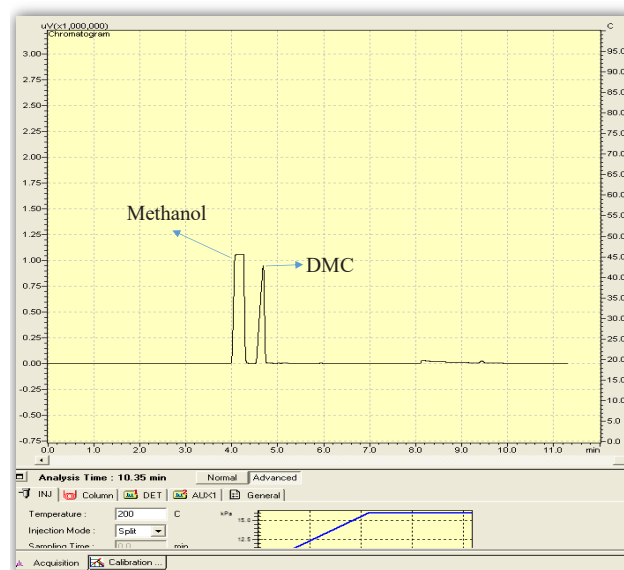

Figure 4: Gas chromatograph of reaction mixture DMC.

## Table caption

### Solvents screening for ILs synthesis

In a typical synthesis, 1.0 mmol di-mesylate precursor and 2.1 mmol 1-vinyl-imidazole was added in round bottom flask containing 30 mL of ethanol (For the solvent study we used here the excess amount of solvent to checked the complete solubility of the precursor. In order to that the precursor amount used is also higher for the optimization of reaction conditions) is then, reaction mixture refluxed under inert gas atmosphere at 80°C for 72 h, then slowly reaction mixture was cool down at room temperature furthermore, excess solvent were removed out under high vacuum followed by ethyl acetate washing to removed out starting material and dried under vacuum oven at 30°C up to 12 h. Further the IL was synthesized using a similar protocol as explained above except Toluene was used instead of ethanol (Table 3 entry 1-6).

**Table 3: Solvents screening for ILs synthesis.**

| Entry | Solvents      | Time (h) | Isolated yield (%) |
|-------|---------------|----------|--------------------|
| 1     | Ethanol       | 72       | 48.4               |
| 2     | Toluene       | 72       | 55.3               |
| 3     | Ethyl acetate | 72       | 62.1               |
| 4     | DMSO          | 72       | 68.5               |
| 5     | DCE           | 72       | 75.8               |
| 6     | Acetonitrile  | 72       | 90.4               |

Reaction conditions: Dimesylate precursor 1.0 mmol, 1-vinyl imidazole 2.1 mmol, solvent 30 mL, 80°C.
